# Supplementary material for: Auxin mediates the touch-induced mechanical stimulation of adventitious root formation under windy conditions in Brachypodium distachyon
Source: Springer Nature journal article supplement (doi:10.1186/s12870-020-02544-8), 2020-07-16
Supplement: MOESM10 [file 12870_2020_2544_MOESM10_ESM.pdf]

## Supplementary Figure 10

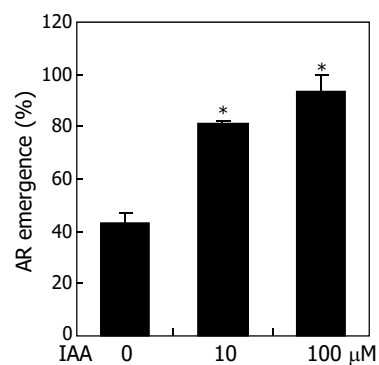

**Fig. S10** Effects of IAA on AR formation. Three-week-old plants grown in soil were artificially fallen down, as described in Figure 5, and IAA solutions (either 10 or 100 μM) were sprayed once a day for ten days. Three measurements of AR emergence, each consisting of sixteen plants, were statistically analyzed (*t*-test, \**P* < 0.01). Error bars indicate SE.
